# Supplementary material
Source: Springer Nature journal article supplement (https://www.springermedizin.de/resource/supplementary/12958_2012_1035_MOESM23_ESM.pdf/9566656)

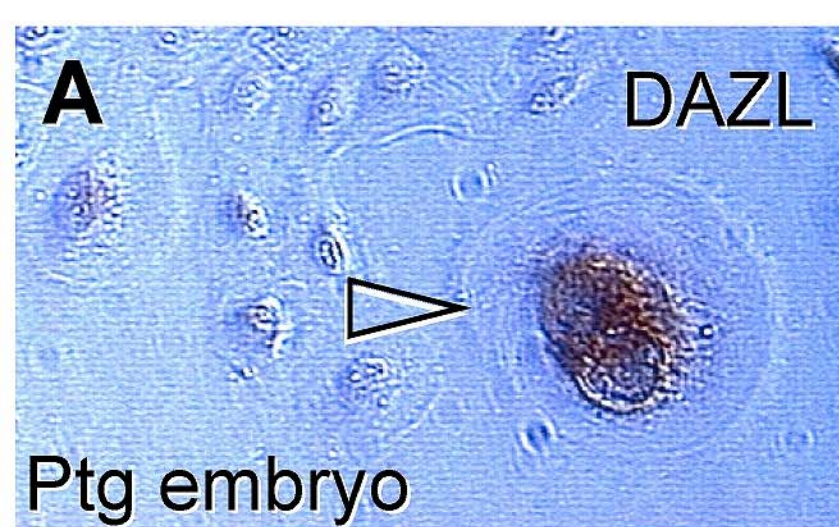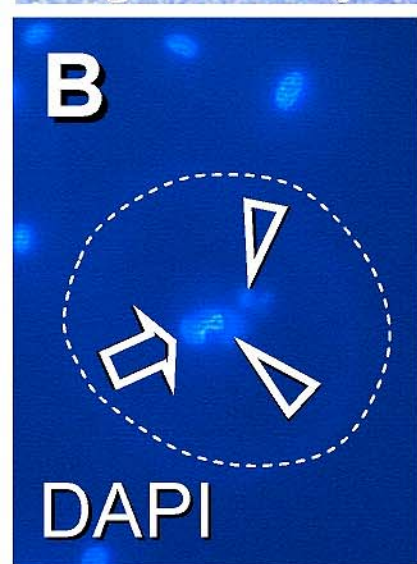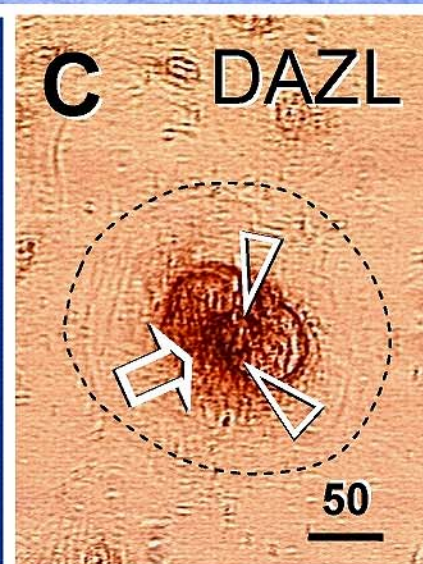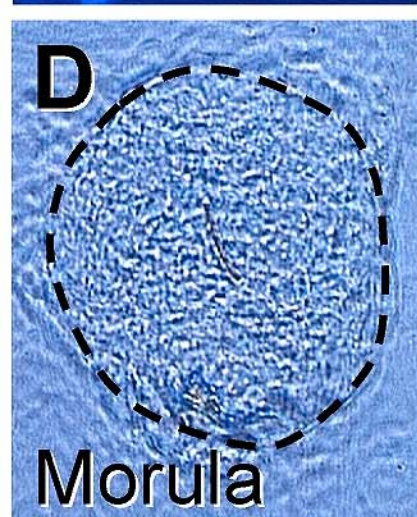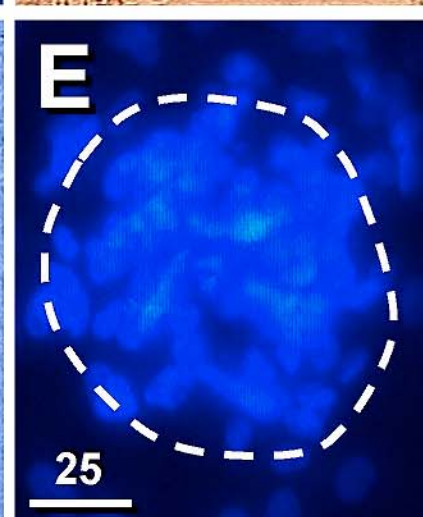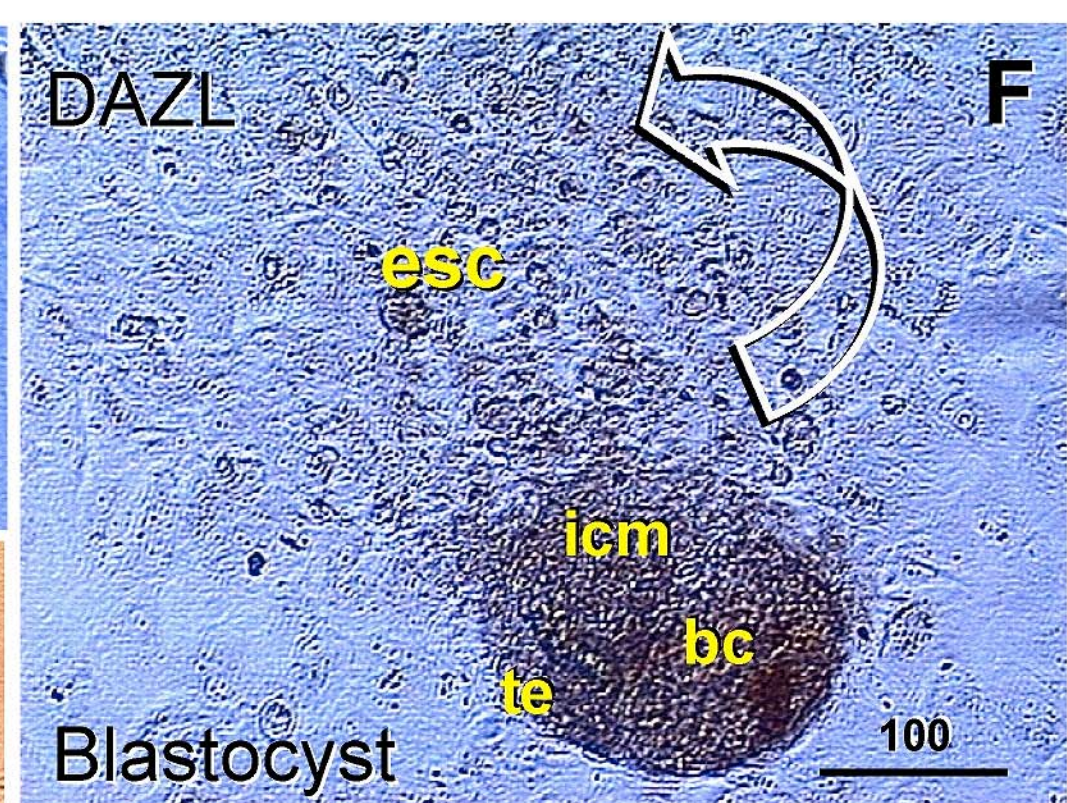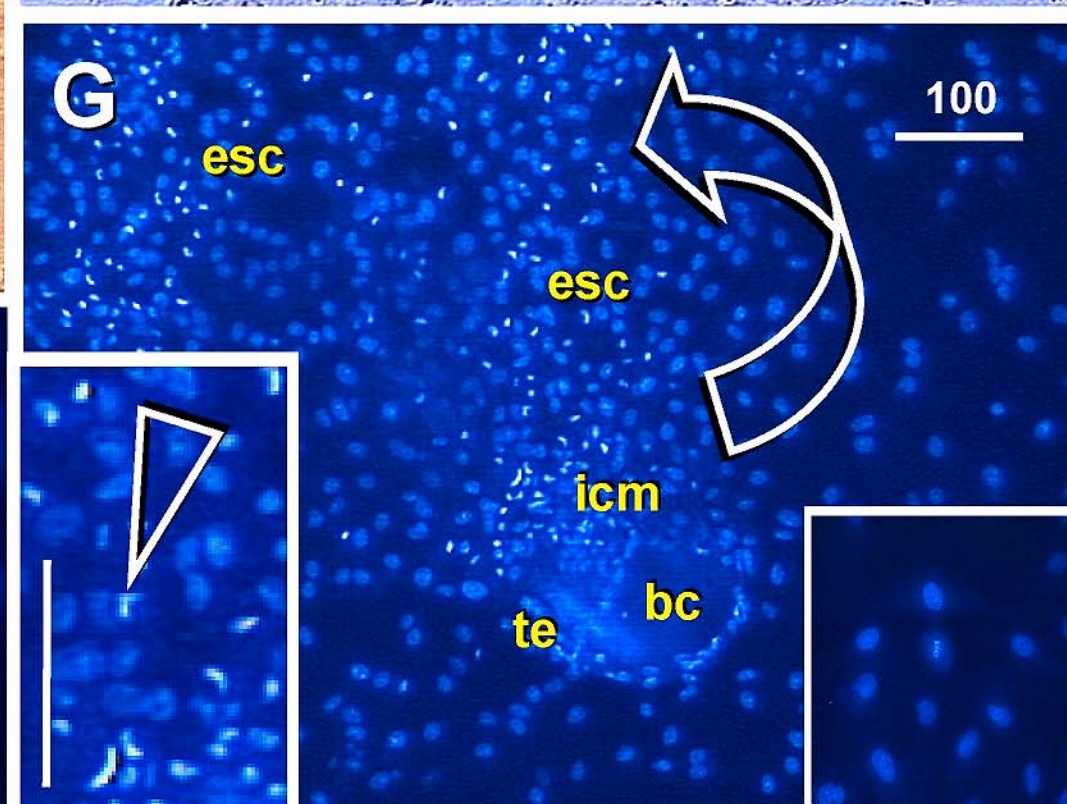

Supplement: MOESM23 [file 9566656]
